# Supplementary material
Source: PubMed Central journal article supplement (PMC6583192)

## Supplementary Online Content

Slomine BS, Silverstein FS, Christensen JR, et al. Neuropsychological outcomes of children 1 year after pediatric cardiac arrest: secondary analysis of 2 randomized clinical trials. *JAMA Neurol*. Published September 17, 2018. doi:10.1001/jamaneurol.2018.2628

**eAppendix.** Personnel, Sites, Funding and Acknowledgements

**eTable 1.** Demographic Variables Between Eligible Cases With VABS-II Interview and Onsite Testing Data and Those Whose Families Declined Either or Both Evaluations <6 Years

**eTable 2.** Demographic Variables Between Eligible Cases With VABS-II Interview and Onsite Testing Data and Those Whose Families Declined Either or Both Evaluations >6 Years

**eTable 3.** Spearman Correlations Among Vineland Adaptive Behavior Scales – Second Edition (VABS-II) and Overall Cognitive Outcome Measures

**eFigure.** Description of Eligible Survivors Who Were Included and Excluded

This supplementary material has been provided by the authors to give readers additional information about their work.

## **eAppendix. Personnel, Sites, Funding and Acknowledgements**

### **Lead Site - University of Michigan, Ann Arbor, Michigan**

**Principal Investigator (PI) (Scientific)** - Frank W. Moler, MD, MS

### **Data Coordinating Center (DCC), University of Utah, Salt Lake City, Utah.**

**Principal Investigator DCC** - J. Michael Dean, MD, MBA

**Lead Biostatistician** - Richard Holubkov, PhD

### **Outcome Center, Kennedy Krieger Institute, Baltimore, Maryland. Academic affiliation with Johns Hopkins University, School of Medicine**

James R. Christensen, MD, Beth S. Slomine, PhD

#### **Executive Committee**

|                       |                         |                            |
|-----------------------|-------------------------|----------------------------|
| F. Moler, MD, MS,     | PI (Scientific)         | University of Michigan     |
| J. M. Dean, MD, MBA   | PI (DCC)                | University of Utah         |
| R. Holubkov, PhD      | Biostatistician         | University of Utah         |
| K. Meert, MD          | Critical Care           | Wayne State University     |
| J. Hutchison, MD      | Critical Care           | University of Toronto      |
| V. Nadkarni, MD       | Critical Care           | University of Pennsylvania |
| S. Shankaran, MD      | Neonatology             | Wayne State University     |
| F. Silverstein, MD    | Neurology               | University of Michigan     |
| J. Christensen, MD    | Rehabilitation Medicine | Kennedy-Krieger Institute  |
| V. Pemberton, RNC, MS | NHLBI                   | NIH                        |
| C. Nicholson, MD, MS  | NICHD, CPCCRN           | NIH                        |

#### **Sites and research teams - contributors**

#### **We acknowledge the contributions of the following sites and individuals who made the THAPCA-OH and THAPCA-IH Trials possible.**

Site principal investigators (PI), Sub-investigators (Sub-I), Clinical research coordinators (CRC), Neurologists (Neurologist), Psychologists (Psychologist).

#### **The Children's Hospital of Alabama, Birmingham, AL**

J. Alten (PI), S. Borasino (Sub-I), K. Hock (CRC), K. Sewell (CRC), L. Dure (Neurologist),

#### **Phoenix Children's Hospital, Phoenix, AZ**

H. J. Dalton (PI), S. Buttram (PI), K. Wai (Sub-I), A. La Bell (CRC), C. Bliss (CRC), M. Lavoie (Psychologist), V. Bordes-Edgar (Psychologist)

#### **Diamond Children's Medical Center, Tucson, AZ**

A. Theodorou (PI), K. Typpo (Sub-I), C. Wells (CRC), J. Deschenes (CRC)

#### **Children's Hospital Los Angeles, Los Angeles, CA**

C. Newth (PI), S. Rubin (Sub-I), R. Bart (Sub-I), T. Deakers (Sub-I), A. Bhalla (Sub-I), B. Markovitz (Sub-I), J. DiCarlo (Sub-I), P. Ross (Sub-I), C. Herrington (Sub-I), W. Wells (Sub-I), R. Kim (Sub-I), V. Wang (Sub-I), M. Villa (RN), F. Fajardo (CRC), J. Kwok (CRC), J. Serrano (CRC), J. Valentine (CRC), A. Yamakawa (CRC), S. Briones (CRC), S. Cauley (RN), A. Briseno (RN), C. Young (RN), M. Nyc (CRC), T. Rosser (Neurologist), J.I. Gold (Psychologist), R. Engilman (Psychometrician)

**Children's Hospital of Orange County, Orange, CA**

A. Schwarz (PI), J. Haykawa (Sub-I), O. Vargas-Shiraishi (CRC), A. Galion (Neurologist)

**Loma Linda University Children's Hospital, Loma Linda, CA**

M. Mathur (PI), J. Newcombe (CRC), A. Pinto (CRC), S. Ashwal (Neurologist), J. Pivonka-Jones (Neuropsychologist)

**Mattel Children's Hospital UCLA, Los Angeles, CA**

R. Harrison (PI), R. Kelly (Sub-I), A. Madikians (Sub-I), M. Federman (Sub-I), M. Morgan (Sub-I), A. Yamakawa (CRC), M. Nyc (CRC), S. Briones (CRC), M. Villa (RN), J. Kwok (CRC), J. Serrano (CRC), J. Valentine (CRC) T. Rosser (Neurologist), R. Engelman (Psychometrician), J.I. Gold (Psychologist)

**University of California, San Francisco Benioff Children's Hospital, San Francisco, CA**

P. McQuillen (PI), L. Haeusslein (CRC), H. Glass (Neurologist)

**Hospital for Sick Children, Toronto, ON, Canada**

J. Hutchison (PI), S. Schwartz (Sub-I), A. Guerguerian (Sub-I), K. Boutis (Sub-I), D. Clark (CRC), J. Van Huysel (CRC), K. Fusco (CRC), K. McBain (CRC), A. Krancevic (CRC), L. Toller (CRC), R. Gaiteiro (CRC), C. Hahn (Neurologist), R. Sananes (Psychologist)

**Children's Hospital Colorado, Aurora, CO**

E. Dobyms (PI), J. Albiets (Sub-I), T. Wilson (CRC), B. Wathen (CRC), T. Bernard (Neurologist), J. Dise-Lewis (Psychologist)

**Children's Healthcare of Atlanta, Atlanta, GA**

N. Pham (PI), N. Chanani (Sub-I), K. Walson (Sub-I), J. Sturm (Sub-I), W. Mahle (Sub-I), M. Wolf (Sub-I), C. Stone (CRC), A. Wellons (CRC), S. Meisner (CRC), E. Hoar (CRC), S. Gentry (CRC), L. Smitley (CRC), L. McMaster (CRC), P. Holt (Neurologist), B. Weissman (Neurologist), A. Alexander (Psychologist)

**Riley Hospital for Children, Indianapolis, IN**

R. Lutfi (PI), D. Sokol (neurologist), B. McDonald (psychologist)

**Anne and Robert Lurie Children's Hospital of Chicago, Chicago, IL**

D. Goodman (PI), E. Powell (Sub-I), S. Shah (CRC),

**Kosair Charities Pediatric Clinical Research Unit, Department of Pediatrics, University of Louisville and the Kosair Children's Hospital, Louisville, KY**

M. Porter (PI), J. Sullivan (Sub-I), M. Ruppe (Sub-I), J. Berkenbosch (Sub-I), M. Thomas (CRC), L. Sears (Psychologist)

**Johns Hopkins Children's Center, Baltimore, MD**

U. Bhalala (PI), J.K. Lee (PI), S. Kudchadkar (PI), D. Shaffner (Sub-I), M. Shackelford (CRC), P. Melvin (CRC), R. Felling (Neurologist), B. Slomine (Psychologist)

**Outcome Center, Kennedy Krieger Institute, Baltimore, MD**

J.R. Christensen (Site PI), B.S. Slomine (Site Co-Investigator), E. DeMatt (Telephone Interviewer), M. Talley (Telephone Interviewer), C. Rodweller (Telephone Interviewer)

**Children's Hospital of Michigan, Detroit, MI**

K. Meert (PI), S. Heidemann (Sub-I), J. Clark (Sub-I), A. Pawluszka (CRC), M. Lulic (RA), L. Sivaswamy (Neurologist)

**C.S. Mott Children’s Hospital, University of Michigan, Ann Arbor, MI**

F. Moler (PI), M. Gaies (Sub-I), T. Cornell (Sub-I), M. Weber (CRC), J. Reske (CRC), L. Conlin (CRC), F. Silverstein (Neurologist), M. Carlson (Neurologist), S. Warschausky (Psychologist), T. Behnke (Program Administrator), D. Poszywak (Procurement Subcontract Administrator)

*“Research reported in this publication was supported by the National Center for Advancing Translational Sciences of the National Institutes of Health under Award Numbers ULI TR 000433 and ULI TR 000433. The content is solely the responsibility of the authors and does not necessarily represent the official views of the National Institutes of Health.”*

**Children’s Hospitals and Clinics of Minnesota, Minneapolis, MN**

J. Nowak (PI), H. Ortega (EM Sub-I), D. Milner (EM Sub-I), E. Zielinski (CRC)

**Washington University, St. Louis, MO**

J. Pineda (PI), M. Shoykhet (Sub-I), S. Friess (Sub-I), K. Guilliams (Sub-I), A. Gazit (Sub-I), D. Jaffe (Sub-I), T. Day (CRC), T. Hicks (CRC), L. Barganier (CRC), E. Fish (CRC), L. Toennies (CRC), P. Thurst (CRC), S. Blankenship (CRC), M. Noetzel (Neurologist), K. Guilliams (Neurologist), D. White (Psychologist).

*“Research reported in this publication was supported by the Eunice Kennedy Shriver National Institute Of Child Health & Human Development of the National Institutes of Health under Award Number U54 HD087011 to the Intellectual and Developmental Disabilities Research Center at Washington University. The content is solely the responsibility of the authors and does not necessarily represent the official views of the National Institutes of Health.”*

**Morgan Stanley Children’s Hospital/Columbia University Medical Center New York, NY**

C. Schleien (PI), N. Talathoti (CRC), C. Aguilar (CRC), V. Hinton (Psychologist)

**University of Rochester Medical Center/Golisano Children’s Hospital, Rochester, NY**

E. W. van der Jagt, (PI), E. R. Taillie (CRC), E. B. Nazarian (Sub-I), L. E. Daugherty (Sub-I), C.O. Davis (Sub-I), H. R. Adams (Psychologist)

**Duke Children’s Hospital, Durham, NC**

G. Ofori-Amanfo (PI), K. Rehder (PI), S. Wrenn (CRC), T. Uhl (CRC), C. Milleson (CRC), E. Smith (Neurologist), K. Gustafson (Psychologist), S. Asbeck (Psychologist), W. Gallentine (Neurologist)

**Nationwide Children’s Hospital, Columbus, OH**

E. Lloyd (PI), M. Hall (Sub-I), N. Khan (Sub-I), J. Frazier (Sub-I), Daniel Cohen (Sub-I), J. Haines (CRC), K. Carter (CRC), L. Bird (CRC), W. Lo (Neurologist)

**Cincinnati Children’s Hospital, Cincinnati, OH**

D. Wheeler (PI), G. Geis (Sub-I), E. Beckman (CRC), S. Banschbach (CRC), K. Krallman (CRC)

**Rainbow Babies and Children’s Hospital, Cleveland, OH**

K. Lidsky (PI), S. Bergant (CRC), A. Browning (CRC), N. Bass (Neurologist), R. Tangen (Psychologist)

**Penn State Children’s Hospital, Hershey, PA**

NJ. Thomas (PI), A. Shelly (CRC), J. Vallati (CRC), P. Carper (CRC), D. Spear (CRC), A. McMonagle (CRC), J. Stokes (CRC), H. Watts (CRC), W. Trescher (Neurologist), C. Flaherty-Craig (Psychologist)

**Children’s Hospital of Philadelphia, Philadelphia, PA**

A. Topjian (PI), R. Berg (Sub-I), V. Nadkarni (Sub-I), A. Zuppa (Sub-I), J. Fitzgerald (Sub-I), P. Meaney (Sub-I), M. DiLiberto (CRC), C. Twelves (CRC), S. McGowan (CRC), M. Sisko (CRC), B. Park (CRC), K. Friedman (Psychologist),

*The project described was supported by the National Center for Research Resources and the National Center for Advancing Translational Sciences, National Institutes of Health, through Grant UL1TR000003. The content is solely the responsibility of the authors and does not necessarily represent the official views of the NIH.*

**University of Pittsburgh Medical Center, Pittsburgh, PA**

E. Fink (PI), R. Hickey (Sub-I), A. Abraham (CRC)

**University of Tennessee Health Science Center, Memphis, TN**

S. Shah (PI), K. Anand (Sub-I), B. Moore (CRC), A. Nico West (CRC), M. Grandberry (CRC), N. Shah (Neurologist), A. DeCrow (Psychologist), O. King DeBerry (Psychometrician), A. Huling (Psychometrician)

**Children's Medical Center Dallas, University of Texas Southwestern Medical School, Dallas, TX**

J. Koch (PI), P. Okada (Sub-I), D. Miles (Sub-I), L. Raman (Sub-I), M. Green (Sub-I), E. Golson (CRC), A. Jones (CRC), D. Kelly (CRC), T. Plumb (CRC), K. Van de Bruinhorst (CRC), M. Dowling (Neurologist), P. Stavinoha (Psychologist), A. Hernandez (Psychometrician)

**University of Texas Health Sciences Center at San Antonio, San Antonio, TX**

T. Wu (PI), C. Bauerfeld (Sub-I), M. Rodkey (Sub-I), H. Dibrell (CRC), S. Atkinson (Neurologist), L. O'Donnell (Psychologist), J. Eubanks (Psychologist)

**Data Coordinating Center (DCC), University of Utah, Salt Lake City, UT**

J. M. Dean (PI), R. Holubkov (Biostatistician), B. Browning (Program Director), M. Gildea (Program Director), R. Kuhn (Project Manager), A. Webster (Biostatistician), K. Page (Biostatistician), R. Telford (Biostatistician), L. Herrera (Data Manager), J. Yearley (Director Data Management), J. Burr (CPCCRN Program Director), B. Marron (Administrative Assistant)

**Primary Children's Hospital, Salt Lake City, UT**

K.S. Bennett (PI), J. Sweney (PI), R. Lane (Sub-I), J. Lilley (CRC), S. Bjerregaard (CRC), K. Jacobsen (CRC), A. Watson (CRC), D. Stephens (CRC), M. Delacruz (CRC), K. Cooley (CRC), N. Kwendakwema (CRC), G. Jensen (CRC), R. Moore (CRC), M. Sweney (Neurologist), D. Morita (Neurologist), R. Burr (Psychologist), T. Bennett (Sub-I), J. Henriksen (Sub-I), E. Hirshberg (Sub-I), G. Larsen (Sub-I), M. Schober (Sub-I), R. Dixon (Sub-I), J. Workman (Sub-I)

**Seattle Children's Hospital, Seattle, WA**

J. Zimmerman (PI), J. McGuire (Sub-I), R. Farris (Sub-I), O. Yanay (Sub-I), J. Reid (Sub-I), L. Smith (Sub-I), S. Hamilton (CRC), C. Greeley (CRC), C. Cheng (CRC), S. Gospe (Neurologist), C. Amlie-Lefond (Neurologist), D. Breiger (Psychologist), A. Paolozzi (Psychometrist)

**Children's National Medical Center, Washington, DC**

J. Berger (PI), D. Wessel (Sub-I), M. Sharron (Sub-I), S. Basu (Sub-I), A. Wratney (Sub-I), N. Dean (Sub-I), J. Reardon (CRC), E. Tomanio (CRC), J. Carpenter (Neurologist), S. Swanson (Psychologist), T. Brennan (Psychologist), P. Glass (Psychologist), B. Malek (Psychologist), M. Mintz (Psychologist) *Our follow ups were conducted in the Clinical Research Center which is supported by NIH P30HD040677*

**Medical College of Wisconsin, Milwaukee, WI**

M. T. Meyer (PI), M. Wakeham (Sub-I), S. Hanson (Sub-I), K. Murkowski (CRC)

**National Heart, Lung, and Blood Institute, Bethesda, MD**

V. Pemberton

**Funding**

Primary support for the conduct of the THAPCA-IH and OH Trial was funding from the National Institutes of Health (NIH), National Heart, Lung, and Blood Institute, Bethesda, MD. HL094345 (FWM) and HL094339 (JMD).

Additional support from the following federal planning grants contributed to the planning of the THAPCA Trials: NIH, *Eunice Kennedy Shriver* National Institute of Child Health and Development (NICHD), Bethesda, MD. HD044955 (FWM) and HD050531 (FWM).

In part support was from the participation of the following research networks: Pediatric Emergency Care Applied Research Network (PECARN) from cooperative agreements U03MC00001, U03MC00003, U03MC00006, U03MC00007, and U03MC00008; and the Collaborative Pediatric Critical Care Research Network (CPCCRN) from cooperative agreements (U10HD500009, U10HD500096, U10HD049981, U10HD049945, U10HD049983, U10HD050012 and U01HD049934.

At several centers (indicated above), clinical research support was supplemented by the following grants or Cooperative Agreements: UL1TR000003, P30HD040677, UL1 TR 000433 and U54 HD087011.

eTable 1: Demographic variables between eligible cases with 12-month VABS-II interview and onsite testing data and those whose families declined either or both evaluations - < 6 years

|                                                                                                  | Overall<br>(N = 146) | Testing Completed |                  | P-value            |
|--------------------------------------------------------------------------------------------------|----------------------|-------------------|------------------|--------------------|
|                                                                                                  |                      | No<br>(N = 27)    | Yes<br>(N = 119) |                    |
| <b>Study</b>                                                                                     |                      |                   |                  | 0.374 <sup>2</sup> |
| IH                                                                                               | 96 (66%)             | 20 (74%)          | 76 (64%)         |                    |
| OH                                                                                               | 50 (34%)             | 7 (26%)           | 43 (36%)         |                    |
| <b>Age at Randomization (years):</b><br>Median [Q1, Q3]                                          | 0.5 [0.2, 1.7]       | 0.6 [0.2, 1.7]    | 0.5 [0.2, 1.8]   | 0.623 <sup>1</sup> |
| <b>Male</b>                                                                                      | 88 (60%)             | 18 (67%)          | 70 (59%)         | 0.518 <sup>2</sup> |
| <b>Race</b>                                                                                      |                      |                   |                  | 0.660 <sup>2</sup> |
| White                                                                                            | 87 (60%)             | 15 (56%)          | 72 (61%)         |                    |
| Black or African American                                                                        | 35 (24%)             | 6 (22%)           | 29 (24%)         |                    |
| Other/Unknown                                                                                    | 24 (16%)             | 6 (22%)           | 18 (15%)         |                    |
| <b>Ethnicity</b>                                                                                 |                      |                   |                  | 0.922 <sup>2</sup> |
| Hispanic or Latino                                                                               | 33 (23%)             | 7 (26%)           | 26 (22%)         |                    |
| Not Hispanic or Latino                                                                           | 106 (73%)            | 19 (70%)          | 87 (73%)         |                    |
| Stated as Unknown                                                                                | 7 (5%)               | 1 (4%)            | 6 (5%)           |                    |
| <b>Caregivers highest education received</b>                                                     |                      |                   |                  | 0.308 <sup>2</sup> |
| Some high school or less                                                                         | 21 (14%)             | 5 (19%)           | 16 (13%)         |                    |
| High school graduate or GED                                                                      | 48 (33%)             | 8 (30%)           | 40 (34%)         |                    |
| Vocational school or some college                                                                | 40 (27%)             | 10 (37%)          | 30 (25%)         |                    |
| College degree                                                                                   | 24 (16%)             | 4 (15%)           | 20 (17%)         |                    |
| Graduate or doctoral degree                                                                      | 13 (9%)              | 0 (0%)            | 13 (11%)         |                    |
| <b>Average FAD score: Mean (SD)</b>                                                              | 1.5 (0.40)           | 1.5 (0.35)        | 1.5 (0.41)       | 0.968 <sup>3</sup> |
| <b>Pre-cardiac arrest PCPC</b>                                                                   |                      |                   |                  | 0.804 <sup>1</sup> |
| Normal = 1                                                                                       | 106 (73%)            | 20 (74%)          | 86 (72%)         |                    |
| Mild disability = 2                                                                              | 26 (18%)             | 5 (19%)           | 21 (18%)         |                    |
| Moderate disability = 3                                                                          | 13 (9%)              | 2 (7%)            | 11 (9%)          |                    |
| Severe disability = 4                                                                            | 1 (1%)               | 0 (0%)            | 1 (1%)           |                    |
| <b>Pre-cardiac arrest POPC</b>                                                                   |                      |                   |                  | 0.241 <sup>1</sup> |
| Good = 1                                                                                         | 79 (54%)             | 12 (44%)          | 67 (56%)         |                    |
| Mild disability = 2                                                                              | 44 (30%)             | 9 (33%)           | 35 (29%)         |                    |
| Moderate disability = 3                                                                          | 20 (14%)             | 6 (22%)           | 14 (12%)         |                    |
| Severe disability = 4                                                                            | 3 (2%)               | 0 (0%)            | 3 (3%)           |                    |
| <b>Primary etiology of cardiac arrest</b>                                                        |                      |                   |                  | 0.464 <sup>2</sup> |
| Cardiac                                                                                          | 56 (38%)             | 11 (41%)          | 45 (38%)         |                    |
| Respiratory                                                                                      | 67 (46%)             | 10 (37%)          | 57 (48%)         |                    |
| Other/Unknown                                                                                    | 23 (16%)             | 6 (22%)           | 17 (14%)         |                    |
| <b>Total number of doses of epinephrine administered by EMS and at hospital: Median [Q1, Q3]</b> | 3.0 [2.0, 5.0]       | 3.0 [1.0, 5.0]    | 3.0 [2.0, 5.0]   | 0.990 <sup>1</sup> |
| <b>Estimated duration of chest compressions</b>                                                  |                      |                   |                  | 0.155 <sup>2</sup> |
| Unable to determine                                                                              | 2 (1%)               | 1 (4%)            | 1 (1%)           |                    |
| Less than or equal to 15 minutes                                                                 | 59 (40%)             | 14 (52%)          | 45 (38%)         |                    |
| More than 15 to less than or equal to 30 minutes                                                 | 36 (25%)             | 3 (11%)           | 33 (28%)         |                    |
| More than 30 minutes                                                                             | 49 (34%)             | 9 (33%)           | 40 (34%)         |                    |
| <b>Treatment Assigned</b>                                                                        |                      |                   |                  | 0.134 <sup>2</sup> |

eTable 1: Demographic variables between eligible cases with 12-month VABS-II interview and onsite testing data and those whose families declined either or both evaluations - < 6 years

|                                                                                | Overall<br>(N = 146) | Testing Completed |                   | P-value            |
|--------------------------------------------------------------------------------|----------------------|-------------------|-------------------|--------------------|
|                                                                                |                      | No<br>(N = 27)    | Yes<br>(N = 119)  |                    |
| Hypothermia                                                                    | 80 (55%)             | 11 (41%)          | 69 (58%)          |                    |
| Normothermia                                                                   | 66 (45%)             | 16 (59%)          | 50 (42%)          |                    |
| <b>Post-cardiac arrest length of stay (days): Median [Q1, Q3]</b>              | 33.0 [20.0, 58.0]    | 33.0 [23.0, 49.0] | 32.0 [19.0, 64.0] | 0.849 <sup>1</sup> |
| <b>PCPC at hospital discharge</b>                                              |                      |                   |                   | 0.091 <sup>2</sup> |
| Normal = 1                                                                     | 41 (28%)             | 3 (11%)           | 38 (32%)          |                    |
| Mild disability = 2                                                            | 42 (29%)             | 13 (48%)          | 29 (24%)          |                    |
| Moderate disability = 3                                                        | 26 (18%)             | 5 (19%)           | 21 (18%)          |                    |
| Severe disability = 4                                                          | 24 (16%)             | 4 (15%)           | 20 (17%)          |                    |
| Coma or vegetative state = 5                                                   | 12 (8%)              | 2 (7%)            | 10 (8%)           |                    |
| Missing                                                                        | 1 (1%)               | 0 (0%)            | 1 (1%)            |                    |
| <b>Pre-cardiac arrest VABS-II Adaptive Behavior Composite Score: Mean (SD)</b> | 95.0 (13.72)         | 94.1 (11.54)      | 95.2 (14.21)      | 0.671 <sup>3</sup> |
| <b>Month 12 VABS-II Adaptive Behavior Composite Score: Mean (SD)</b>           | 79.5 (20.86)         | 82.1 (20.54)      | 79.0 (20.97)      | 0.560 <sup>3</sup> |

<sup>1</sup> P-value is based on the Wilcoxon rank-sum test.

<sup>2</sup> Fisher's exact test.

<sup>3</sup> Two-sided t-test with unpooled variance.



eTable 2: Demographic variables between eligible cases with 12-month VABS-II interview and onsite testing data and those whose families declined either or both evaluations -  $\geq 6$  years

|                                                                                                  | Overall<br>(N = 49) | Testing Completed |                  | P-value            |
|--------------------------------------------------------------------------------------------------|---------------------|-------------------|------------------|--------------------|
|                                                                                                  |                     | No<br>(N = 8)     | Yes<br>(N = 41)  |                    |
| <b>Study</b>                                                                                     |                     |                   |                  | 0.128 <sup>2</sup> |
| IH                                                                                               | 30 (61%)            | 7 (88%)           | 23 (56%)         |                    |
| OH                                                                                               | 19 (39%)            | 1 (13%)           | 18 (44%)         |                    |
| <b>Age at Randomization (years):</b><br>Median [Q1, Q3]                                          | 13.8 [9.2, 16.2]    | 15.5 [9.5, 17.3]  | 13.3 [9.2, 15.3] | 0.298 <sup>1</sup> |
| <b>Male</b>                                                                                      | 31 (63%)            | 5 (63%)           | 26 (63%)         | 1.000 <sup>2</sup> |
| <b>Race</b>                                                                                      |                     |                   |                  | 0.561 <sup>2</sup> |
| White                                                                                            | 27 (55%)            | 3 (38%)           | 24 (59%)         |                    |
| Black or African American                                                                        | 16 (33%)            | 4 (50%)           | 12 (29%)         |                    |
| Other/Unknown                                                                                    | 6 (12%)             | 1 (13%)           | 5 (12%)          |                    |
| <b>Ethnicity</b>                                                                                 |                     |                   |                  | 1.000 <sup>2</sup> |
| Hispanic or Latino                                                                               | 9 (18%)             | 1 (13%)           | 8 (20%)          |                    |
| Not Hispanic or Latino                                                                           | 39 (80%)            | 7 (88%)           | 32 (78%)         |                    |
| Stated as Unknown                                                                                | 1 (2%)              | 0 (0%)            | 1 (2%)           |                    |
| <b>Caregivers highest education received</b>                                                     |                     |                   |                  | 0.475 <sup>2</sup> |
| Some high school or less                                                                         | 14 (29%)            | 3 (38%)           | 11 (27%)         |                    |
| High school graduate or GED                                                                      | 6 (12%)             | 2 (25%)           | 4 (10%)          |                    |
| Vocational school or some college                                                                | 9 (18%)             | 0 (0%)            | 9 (22%)          |                    |
| College degree                                                                                   | 13 (27%)            | 2 (25%)           | 11 (27%)         |                    |
| Graduate or doctoral degree                                                                      | 7 (14%)             | 1 (13%)           | 6 (15%)          |                    |
| <b>Average FAD score: Mean (SD)</b>                                                              | 1.5 (0.52)          | 1.6 (0.31)        | 1.5 (0.56)       | 0.546 <sup>3</sup> |
| <b>Pre-cardiac arrest PCPC</b>                                                                   |                     |                   |                  | 0.185 <sup>1</sup> |
| Normal = 1                                                                                       | 41 (84%)            | 8 (100%)          | 33 (80%)         |                    |
| Mild disability = 2                                                                              | 5 (10%)             | 0 (0%)            | 5 (12%)          |                    |
| Moderate disability = 3                                                                          | 3 (6%)              | 0 (0%)            | 3 (7%)           |                    |
| <b>Pre-cardiac arrest POPC</b>                                                                   |                     |                   |                  | 0.847 <sup>1</sup> |
| Good = 1                                                                                         | 32 (65%)            | 5 (63%)           | 27 (66%)         |                    |
| Mild disability = 2                                                                              | 12 (24%)            | 2 (25%)           | 10 (24%)         |                    |
| Moderate disability = 3                                                                          | 5 (10%)             | 1 (13%)           | 4 (10%)          |                    |
| <b>Primary etiology of cardiac arrest</b>                                                        |                     |                   |                  | 0.414 <sup>2</sup> |
| Cardiac                                                                                          | 23 (47%)            | 2 (25%)           | 21 (51%)         |                    |
| Respiratory                                                                                      | 16 (33%)            | 4 (50%)           | 12 (29%)         |                    |
| Other/Unknown                                                                                    | 10 (20%)            | 2 (25%)           | 8 (20%)          |                    |
| <b>Total number of doses of epinephrine administered by EMS and at hospital: Median [Q1, Q3]</b> | 2.0 [1.0, 4.0]      | 1.5 [1.0, 4.5]    | 2.0 [1.0, 4.0]   | 0.622 <sup>1</sup> |
| <b>Estimated duration of chest compressions</b>                                                  |                     |                   |                  | 0.257 <sup>2</sup> |
| Unable to determine                                                                              | 1 (2%)              | 0 (0%)            | 1 (2%)           |                    |
| Less than or equal to 15 minutes                                                                 | 30 (61%)            | 7 (88%)           | 23 (56%)         |                    |
| More than 15 to less than or equal to 30 minutes                                                 | 8 (16%)             | 1 (13%)           | 7 (17%)          |                    |
| More than 30 minutes                                                                             | 10 (20%)            | 0 (0%)            | 10 (24%)         |                    |
| <b>Treatment Assigned</b>                                                                        |                     |                   |                  | 0.448 <sup>2</sup> |
| Hypothermia                                                                                      | 26 (53%)            | 3 (38%)           | 23 (56%)         |                    |
| Normothermia                                                                                     | 23 (47%)            | 5 (63%)           | 18 (44%)         |                    |

eTable 2: Demographic variables between eligible cases with 12-month VABS-II interview and onsite testing data and those whose families declined either or both evaluations -  $\geq 6$  years

|                                                                                | Overall<br>(N = 49) | Testing Completed  |                   | P-value            |
|--------------------------------------------------------------------------------|---------------------|--------------------|-------------------|--------------------|
|                                                                                |                     | No<br>(N = 8)      | Yes<br>(N = 41)   |                    |
| <b>Post-cardiac arrest length of stay (days):</b> Median [Q1, Q3]              | 23.0 [12.0, 55.0]   | 47.5 [22.5, 103.0] | 20.0 [11.0, 50.0] | 0.028 <sup>1</sup> |
| <b>PCPC at hospital discharge</b>                                              |                     |                    |                   | 0.108 <sup>2</sup> |
| Normal = 1                                                                     | 24 (49%)            | 4 (50%)            | 20 (49%)          |                    |
| Mild disability = 2                                                            | 9 (18%)             | 0 (0%)             | 9 (22%)           |                    |
| Moderate disability = 3                                                        | 9 (18%)             | 1 (13%)            | 8 (20%)           |                    |
| Severe disability = 4                                                          | 6 (12%)             | 2 (25%)            | 4 (10%)           |                    |
| Coma or vegetative state = 5                                                   | 1 (2%)              | 1 (13%)            | 0 (0%)            |                    |
| <b>Pre-cardiac arrest VABS-II Adaptive Behavior Composite Score:</b> Mean (SD) | 103.9 (18.26)       | 103.8 (13.56)      | 103.9 (19.18)     | 0.979 <sup>3</sup> |
| <b>Month 12 VABS-II Adaptive Behavior Composite Score:</b> Mean (SD)           | 87.7 (15.42)        | 81.6 (15.71)       | 88.4 (15.41)      | 0.399 <sup>3</sup> |

<sup>1</sup> P-value is based on the Wilcoxon rank-sum test.

<sup>2</sup> Fisher's exact test.

<sup>3</sup> Two-sided t-test with unpooled variance.

eTable 3: Spearman Correlations among Vineland Adaptive Behavior Scales – Second Edition (VABS-II) and Overall Cognitive Outcome Measures

eTable 3a: Spearman Correlations Among the VABS-II and Mullen Scales of Early Learning (Mullen)

| VABS-II                     | Mullen Early Learning Composite (N=117) | Visual Reception (N=118) | Fine Motor (N=118) | Receptive Language (N=118) | Expressive Language (N=118) |
|-----------------------------|-----------------------------------------|--------------------------|--------------------|----------------------------|-----------------------------|
| Adaptive behavior composite | 0.87                                    | 0.80                     | 0.78               | 0.79                       | 0.80                        |
| Communication               | 0.85                                    | 0.76                     | 0.74               | 0.81                       | 0.80                        |
| Daily living                | 0.81                                    | 0.76                     | 0.69               | 0.74                       | 0.75                        |
| Socialization               | 0.82                                    | 0.76                     | 0.73               | 0.73                       | 0.75                        |
| Motor                       | 0.82                                    | 0.76                     | 0.78               | 0.72                       | 0.74                        |

<sup>1</sup> P-value < .001 for all correlations.

eTable 3b: Spearman Correlations Among the VABS-II and Wechsler Abbreviated Scale of Intelligence (WASI)

| VABS-II                     | Full Scale IQ (N=40) | Vocabulary (N=40) | Matrix Reasoning (N=41) |
|-----------------------------|----------------------|-------------------|-------------------------|
| Adaptive behavior composite | 0.45 <sup>1</sup>    | 0.45 <sup>1</sup> | 0.32 <sup>2</sup>       |
| Communication               | 0.49 <sup>1</sup>    | 0.54 <sup>1</sup> | 0.29 <sup>3</sup>       |
| Daily living                | 0.44 <sup>1</sup>    | 0.38 <sup>2</sup> | 0.43 <sup>1</sup>       |
| Socialization               | 0.31 <sup>3</sup>    | 0.31 <sup>3</sup> | 0.21 <sup>3</sup>       |
| Motor                       | 0.38 <sup>2</sup>    | 0.32 <sup>2</sup> | 0.35 <sup>2</sup>       |

<sup>1</sup> P-value < .01.

<sup>2</sup> 0.01 ≤ P-value < .05.

<sup>3</sup> P-value ≥ .05.

e Figure. Description of eligible survivors who were included and excluded

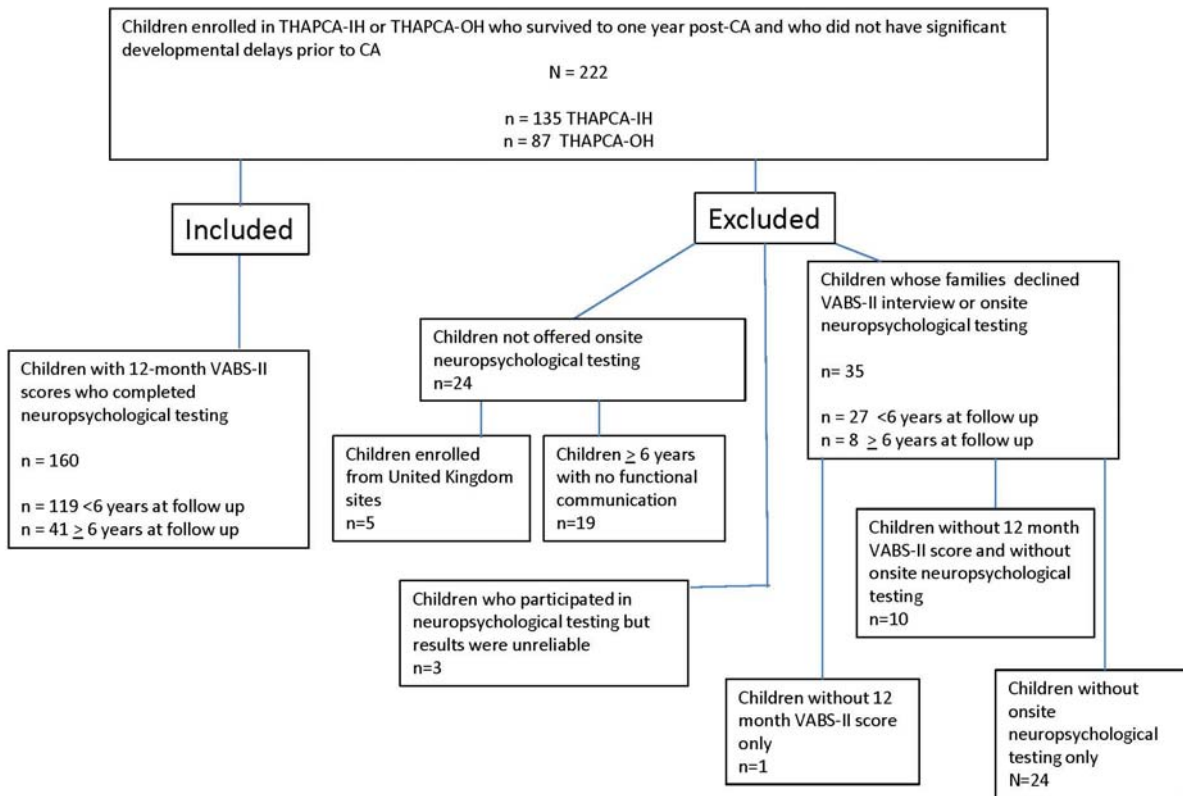

Supplement: jamaneurol-75-1502-s001.pdf [file jamaneurol-75-1502-s001.pdf]
